# Supplementary material for: Ecological interactions among Saccharomyces cerevisiae strains: insight into the dominance phenomenon
Source: PubMed Central journal article supplement (PMC5339867; doi:10.1038/srep43603), 2017-03-07
Supplement: srep43603-s1.pdf [file srep43603-s1.pdf]

# Ecological interactions among *Saccharomyces cerevisiae* strains: insight into the complex dominance phenomenon

Roberto Pérez-Torrado<sup>a1</sup>, Kalliopi Rantsiou<sup>b1</sup>, Benedeta Perrone<sup>b</sup>, Elisabeth Navarro-Tapia<sup>a</sup>, Amparo Querol<sup>a\*</sup> and Luca Cocolin<sup>b\*</sup>

**Supplementary Table 1.** Functional categories of genes significantly altered at least in two time points in mixed (A) and singles cultures (B) dominant strain versus non-dominant strain comparisons.

| (A)                                       |                       |                  |                 |     |
|-------------------------------------------|-----------------------|------------------|-----------------|-----|
| Function                                  | FDR                   | Genes in network | Genes in genome |     |
| structural constituent of cell wall       | 0.0022384725191035206 |                  | 4               | 12  |
| (B)                                       |                       |                  |                 |     |
| Function                                  | FDR                   | Genes in network | Genes in genome |     |
| RNA-directed DNA polymerase activity      | 2,27E-52              |                  | 34              | 45  |
| DNA polymerase activity                   | 1,71E-45              |                  | 34              | 61  |
| DNA-directed DNA polymerase activity      | 1,41E-42              |                  | 33              | 59  |
| retrotransposon nucleocapsid              | 2,27E-38              |                  | 34              | 89  |
| ribonuclease activity                     | 5,40E-36              |                  | 33              | 89  |
| transposition, RNA-mediated               | 1,44E-34              |                  | 34              | 105 |
| transposition                             | 3,86E-34              |                  | 34              | 108 |
| nuclease activity                         | 1,12E-32              |                  | 35              | 135 |
| nucleotidyltransferase activity           | 1,12E-32              |                  | 34              | 118 |
| peptidase activity                        | 2,97E-28              |                  | 33              | 135 |
| hydrolase activity, acting on ester bonds | 1,37E-20              |                  | 35              | 281 |
